# Supplementary material for: Development of Antibacterial Biocomposites Based on Poly(lactic acid) with Spice Essential Oil (Pimpinella anisum) for Food Applications
Source: MDPI journal article supplement (doi:10.3390/polym13213791), 2021-11-01
Supplement: s1 [file s1]

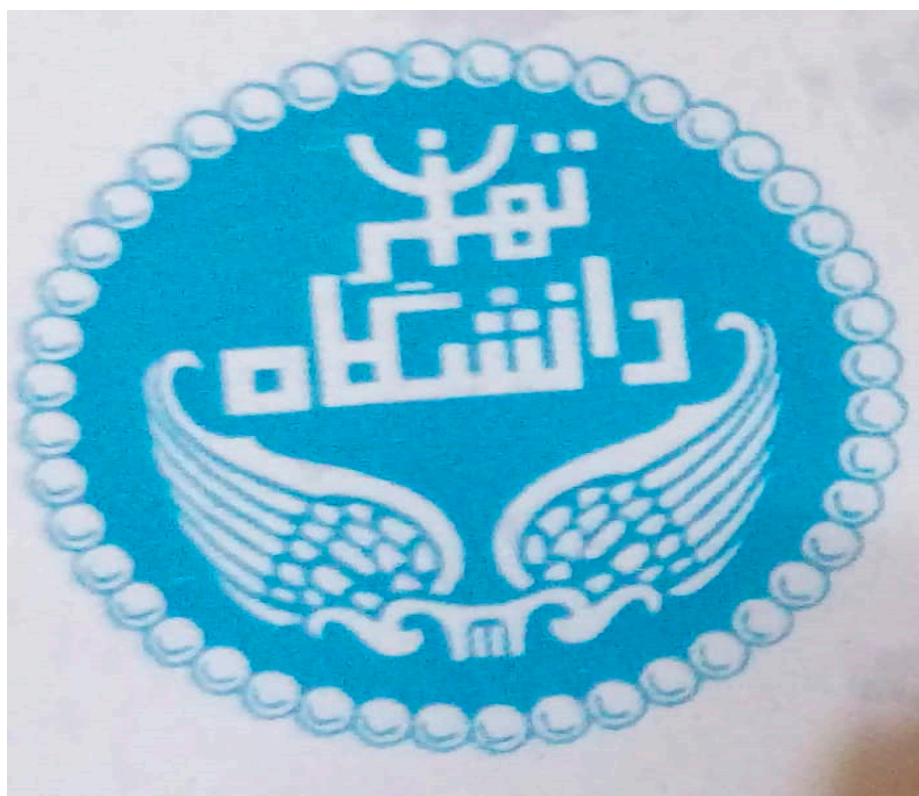

Logo without the films.

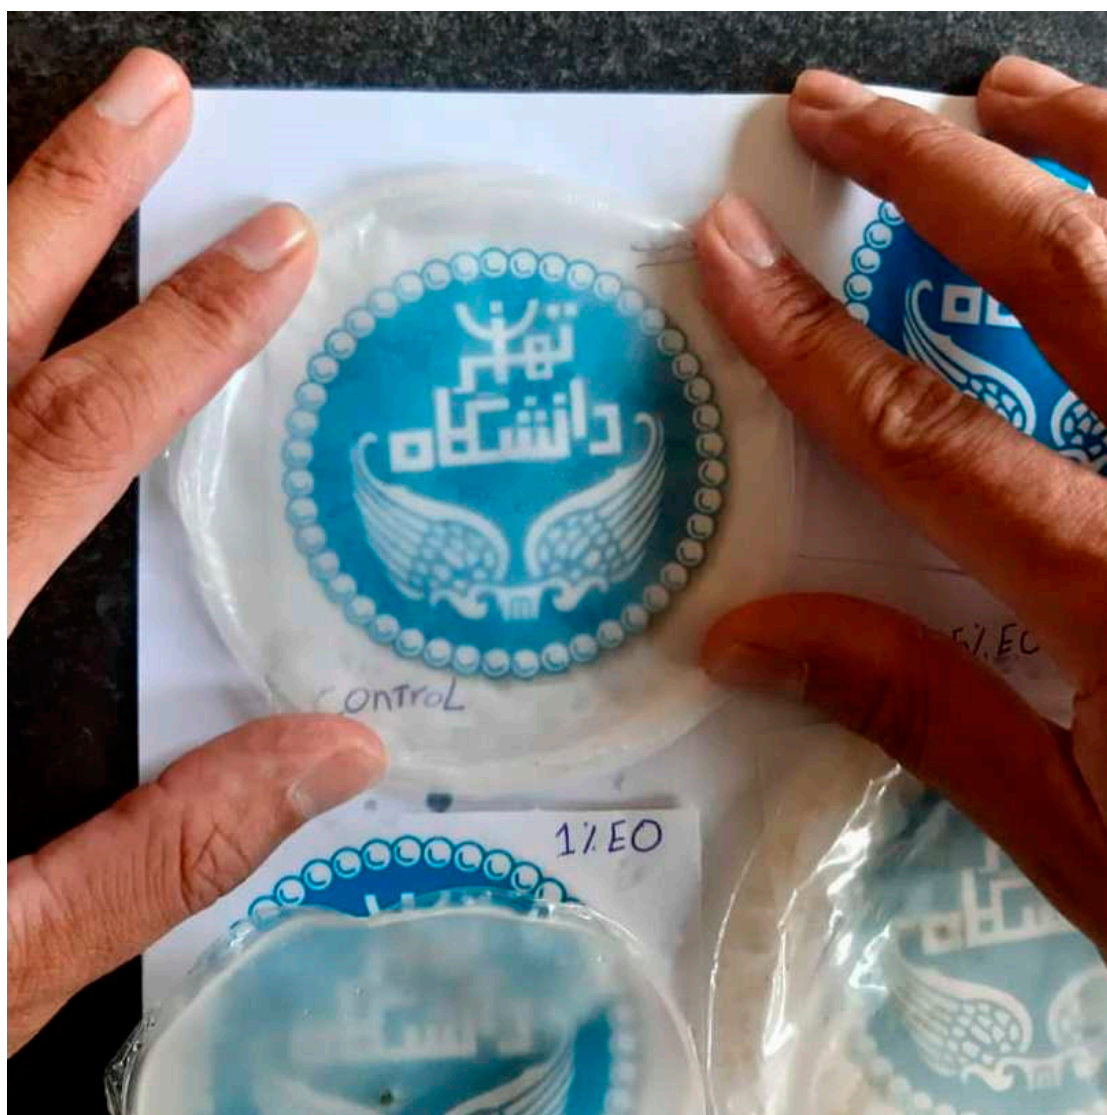

**Figure S1.** Typical PLA films (control) incorporated with *Pimpinella anisum* essential oil of different concentrations (0.5, 1, and 1.5%) as reported in the study.

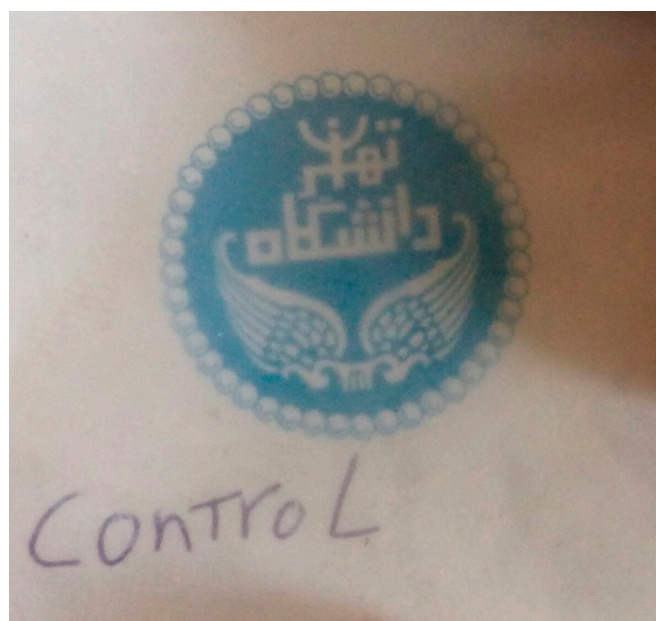

Control (PLA).

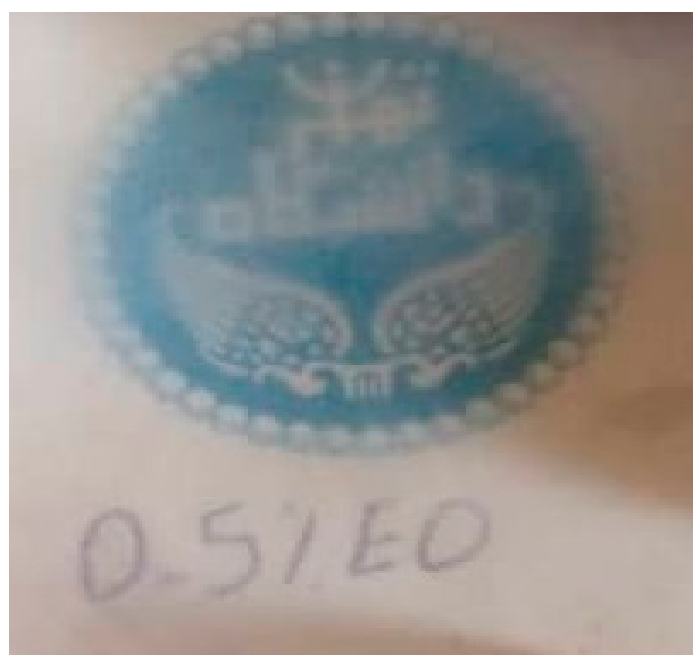

PLA+0.5% EO.

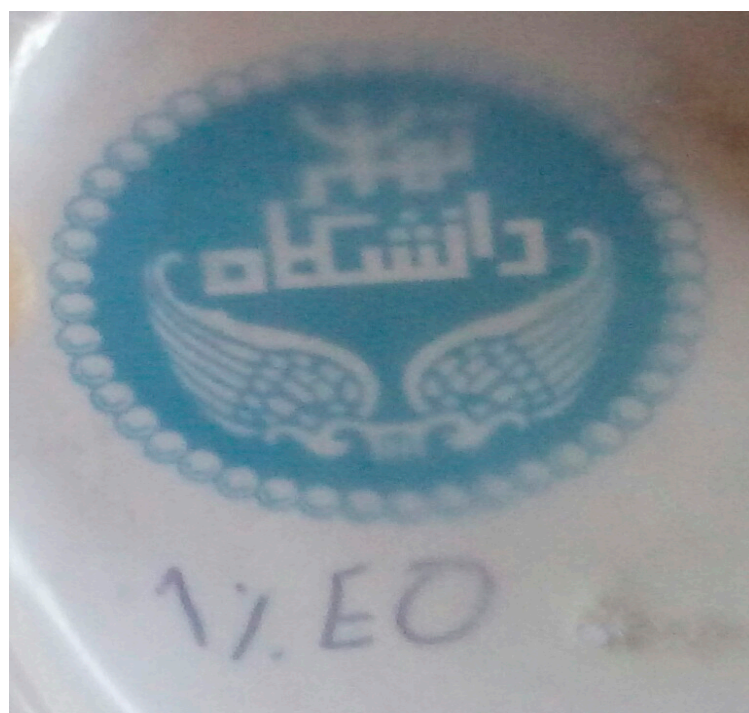

PLA+1% EO.

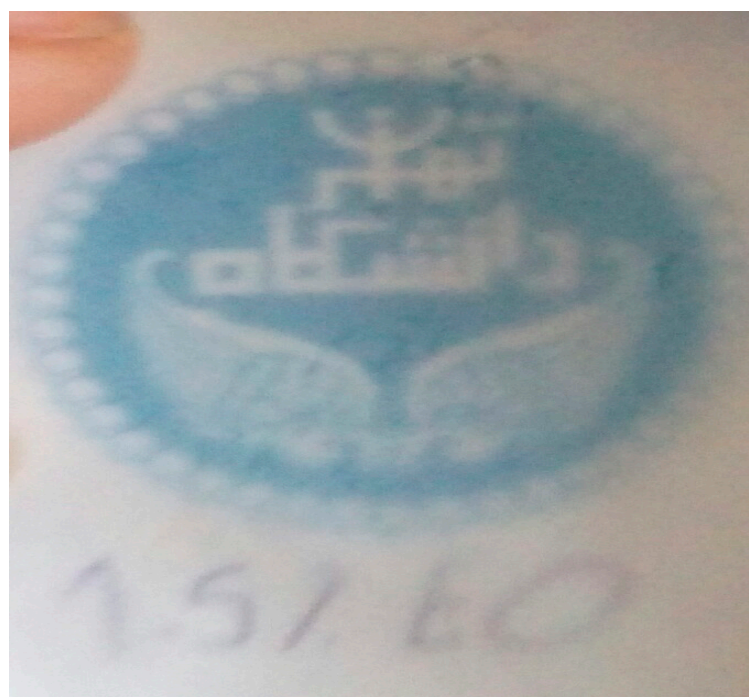

PLA+1.5% EO.
